# Supplementary material for: An integrated flow cytometry-based platform for isolation and molecular characterization of circulating tumor single cells and clusters
Source: PubMed Central journal article supplement (PMC5864750; doi:10.1038/s41598-018-23217-5), 2018-03-22
Supplement: 41598_2018_23217_MOESM1_ESM.pdf [file 41598_2018_23217_MOESM1_ESM.pdf]

# **An integrated flow-cytometry based platform for isolation and molecular characterization of circulating tumor single cells and clusters**

*Neha Bhagwat<sup>1</sup>, Keely Dulmage<sup>2</sup>, Charles H. Pletcher, Jr<sup>3</sup>, Ling Wang<sup>2</sup>, William DeMuth<sup>3</sup>, Moen Sen<sup>4</sup>, David Balli<sup>1</sup>, Stephanie S. Yee<sup>4</sup>, Silin Sa<sup>5</sup>, Frances Tong<sup>2</sup>, Liping Yu<sup>5</sup>, Jonni S. Moore<sup>3</sup>, Ben Z. Stanger<sup>1</sup>, Eric P. Dixon<sup>2</sup>, Erica L. Carpenter<sup>4</sup>*

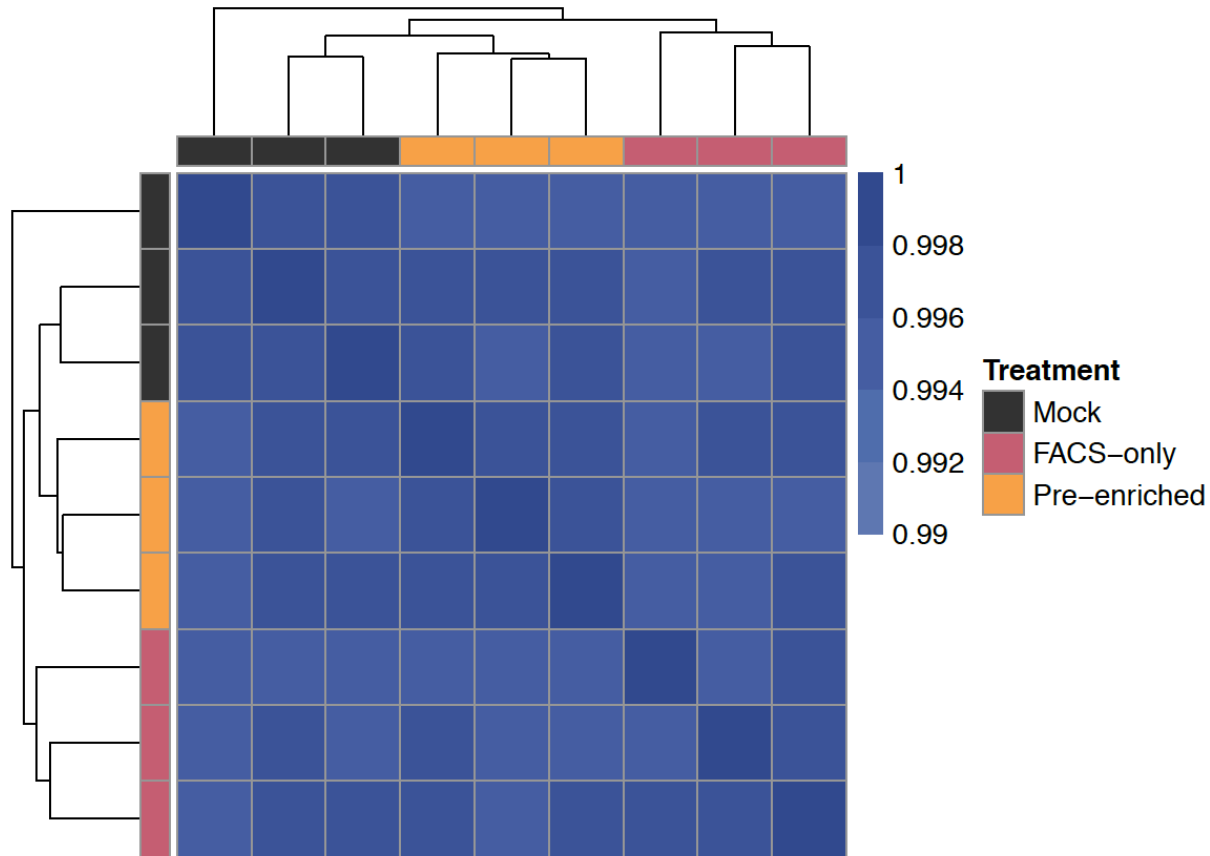

Supplementary Figure S1: Correlation matrix comparing gene expression profiles of PD483 cells as determined by whole transcriptome RNA sequencing. Cells were sorted through the pre-enrichment workflow (Pre-enriched), sorted through Influx only (FACS-only), or were incubated in PBS only on the bench (Mock). Scale refers to Pearson correlation coefficient. (n=3). 13,274 genes were considered in the analysis.

## PD483

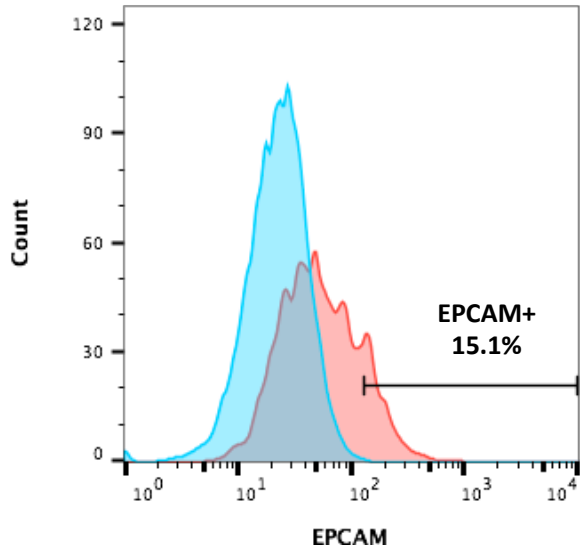

## PD798

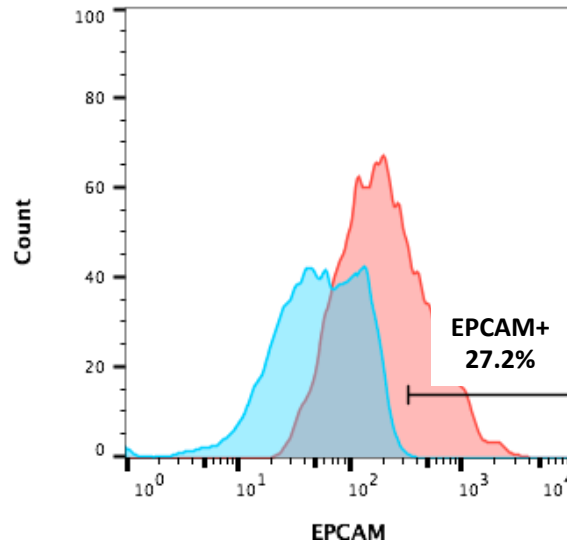

FMO Control  
Sample

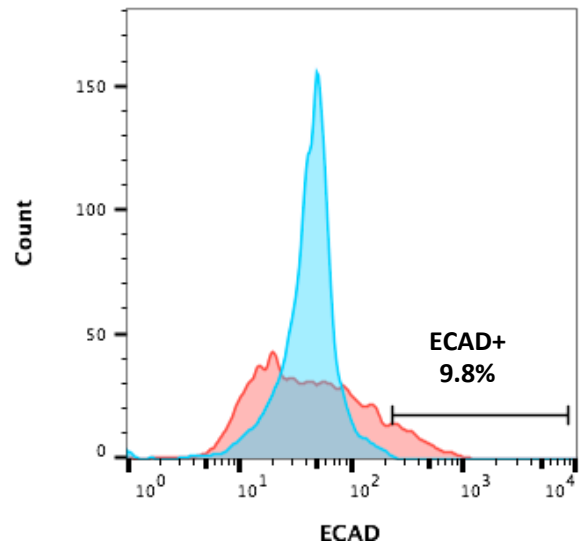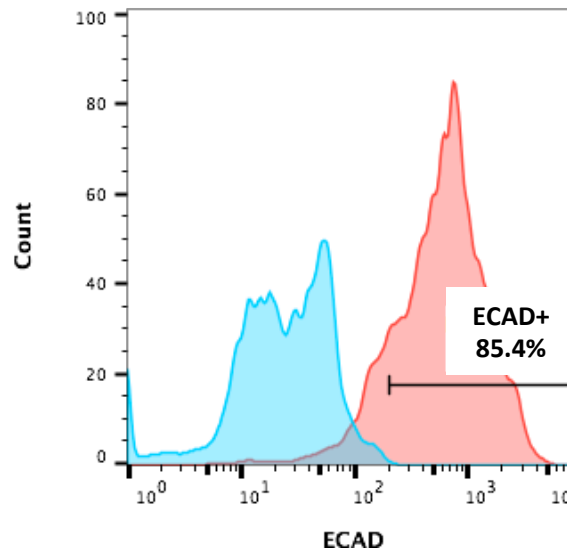

Supplementary Figure S2: EPCAM and ECAD expression in PD798 and PD483 by flow cytometry. FMO: Fluorescence minus one

**a**

| <b>% Uniquely Aligned Reads</b> |            |            |             |
|---------------------------------|------------|------------|-------------|
| <b>Cell number</b>              | <b>Min</b> | <b>Max</b> | <b>Mean</b> |
| <b>1</b>                        | 80.51      | 88.95      | 86.56       |
| <b>10</b>                       | 84.67      | 87.81      | 86.65       |
| <b>100</b>                      | 84.81      | 88.18      | 86.57       |
| <b>500</b>                      | 85.07      | 86.29      | 85.75       |
| <b>RNA</b>                      | 87.77      | 87.98      | 87.88       |

**b**

| <b># Uniquely Aligned Reads</b> |            |            |             |
|---------------------------------|------------|------------|-------------|
| <b>Cell number</b>              | <b>Min</b> | <b>Max</b> | <b>Mean</b> |
| <b>1</b>                        | 5.22E+06   | 4.19E+07   | 1.26E+07    |
| <b>10</b>                       | 4.05E+06   | 3.14E+07   | 1.55E+07    |
| <b>100</b>                      | 3.82E+06   | 9.74E+06   | 5.83E+06    |
| <b>500</b>                      | 4.56E+06   | 9.01E+06   | 6.13E+06    |
| <b>RNA</b>                      | 8.33E+06   | 1.14E+07   | 9.88E+06    |

Supplementary Figure S3: Sequencing metrics from single and pooled cell sequencing of PD798. (a) Percent of reads, and (b) Total number of reads that uniquely aligned to the mouse reference genome.

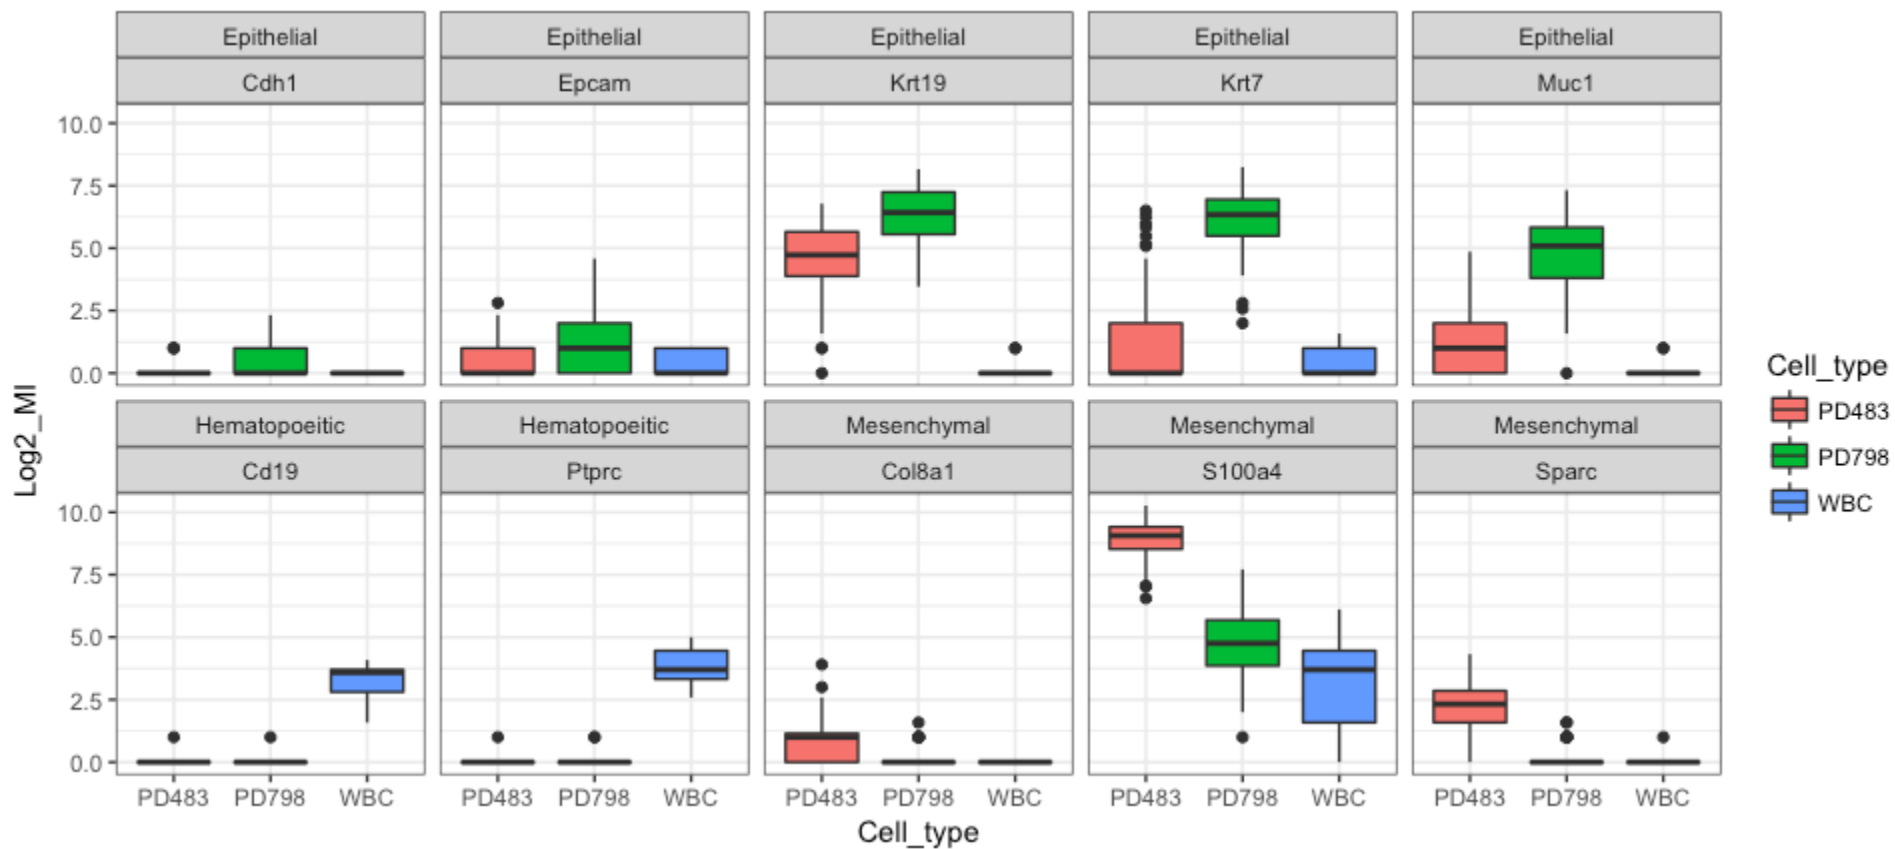

Supplementary Figure S4: Expression of select epithelial, mesenchymal, and hematopoietic genes in PD483, PD798, and WBCs using BD Precise™ assays.

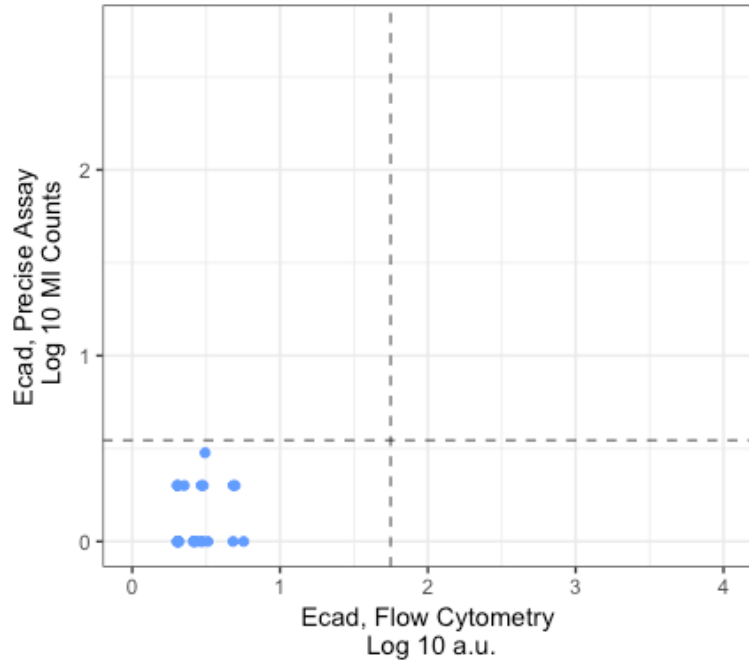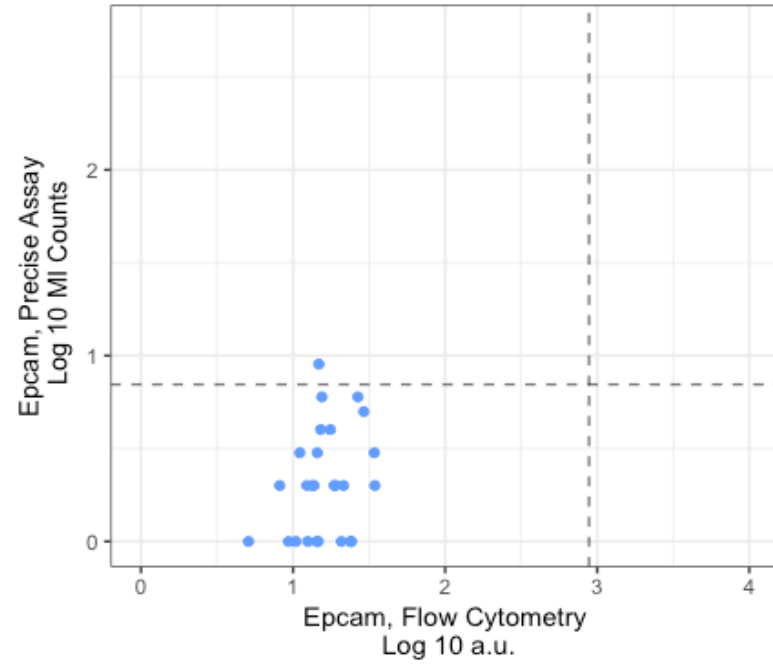

Supplementary Figure S5: Expression of EPCAM and ECAD in WBCs by flow cytometry and by Precise RNA quantification.

Supplementary Table S1: List of genes in BD Precise EMT panel

|         |        |         |          |         |        |
|---------|--------|---------|----------|---------|--------|
| Apc     | Col8a1 | Hpse    | Mmp9     | Set     | Zeb1   |
| Brca1   | Cst7   | Hras    | Msh2     | Smad2   | Zfp957 |
| Brms1   | Ctbp1  | Htatip2 | Mta1     | Smad4   |        |
| Bub1    | Ctnna1 | Igf1    | Mtss1    | Snai1   |        |
| Ccl7    | Ctsk   | Il18    | Muc1     | Snai2   |        |
| Ccnb1   | Ctsl   | Il1b    | Mycl     | Sncg    |        |
| Ccne2   | Cxcl12 | Itga2b  | Myc      | Sparc   |        |
| Cd14    | Cxcr4  | Itga7   | Ncam1    | Src     |        |
| Cd19    | Ddr2   | Itgb3   | Nf2      | Sstr2   |        |
| Cd3e    | Denr   | Kiss1r  | Nme1     | Syk     |        |
| Cd44    | Emc7   | Kiss1   | Nme4     | Tcf20   |        |
| Cd82    | Epcam  | Kras    | Nr4a3    | Tgfb1   |        |
| Cdc20   | Ephb2  | Krt18   | Palld    | Tgfbr2  |        |
| Cdh11   | Esrp1  | Krt19   | Pdgfrb   | Tiam1   |        |
| Cdh1    | Etv4   | Krt20   | Pdpn     | Timp2   |        |
| Cdh2    | Ewsr1  | Krt7    | Plaur    | Timp3   |        |
| Cdh6    | Fap    | Krt8    | Plk1     | Timp4   |        |
| Cdkn2b  | Fat1   | Lum     | Pnn      | Tnc     |        |
| Chd4    | Fcgr4  | Mcam    | Postn    | Tnfsf10 |        |
| Chmp2a  | Fgfr4  | Mcm6    | Psmb2    | Tpbp    |        |
| Cldn2   | Flt4   | Mdm2    | Psmb4    | Trp53   |        |
| Cldn4   | Fn1    | Metap2  | Pten     | Trpm1   |        |
| Cldn7   | Fxyd5  | Met     | Ptprc    | Tshr    |        |
| Col12a1 | Gapdh  | Mgat5   | Rab7     | Twist1  |        |
| Col1a1  | Gli1   | Mmp10   | Rb1      | Vcp     |        |
| Col1a2  | Gnrh1  | Mmp11   | Reep5    | Vegfa   |        |
| Col3a1  | Gpi1   | Mmp13   | Rorb     | Vegfc   |        |
| Col4a2  | Gypa   | Mmp2    | Rrm2     | Vim     |        |
| Col5a1  | Hgf    | Mmp3    | S100a4   | Vps29   |        |
| Col6a1  | Hprt   | Mmp7    | Serpine1 | Wispl   |        |
